# Supplementary material for: Optimisation of trace mineral supplementation in diets for Atlantic salmon smolt with reference to holistic fish performance in terms of growth, health, welfare, and potential environmental impacts
Source: Front Physiol. 2023 Aug 17;14:1214987. doi: 10.3389/fphys.2023.1214987 (PMC10469859; doi:10.3389/fphys.2023.1214987)
Supplement: Supplementary file 1 [file DataSheet1.docx]

Supplementary-Table 1 Salmon feeding trial experimental diet formulations.

| Diet Name | IM 1 | IM 2 | IM 3 | IM 4 | OM 1 | OM 2 | OM 3 | OM 4 |
| --- | --- | --- | --- | --- | --- | --- | --- | --- |
|  | % | % | % | % | % | % | % | % |
| SPC | 22.0 | 22.0 | 22.0 | 22.0 | 22.0 | 22.0 | 22.0 | 22.0 |
| Wheat gluten | 19.22 | 19.22 | 19.22 | 19.22 | 19.22 | 19.22 | 19.22 | 19.22 |
| Horse beans | 11.50 | 11.50 | 11.50 | 11.50 | 11.50 | 12.16 | 11.50 | 11.50 |
| Fish oil | 13.3 | 13.3 | 13.3 | 13.3 | 13.3 | 13.3 | 13.3 | 13.3 |
| Fishmeal | 10.0 | 10.0 | 10.0 | 10.0 | 10.0 | 10.0 | 10.0 | 10.0 |
| Rapeseed oil | 9.7 | 9.7 | 9.7 | 9.7 | 9.7 | 9.7 | 9.7 | 9.7 |
| Soya lecithin | 2.6 | 2.6 | 2.6 | 2.6 | 2.6 | 2.6 | 2.6 | 2.6 |
| NaH2PO4 | 2.5 | 2.5 | 2.5 | 2.5 | 2.5 | 2.5 | 2.5 | 2.5 |
| Krill hydrolysate | 2.0 | 2.0 | 2.0 | 2.0 | 2.0 | 2.0 | 2.0 | 2.0 |
| Vitamin mix | 2.0 | 2.0 | 2.0 | 2.0 | 2.0 | 2.0 | 2.0 | 2.0 |
| Lys (79 %. 19.41 % Cl) | 1.7 | 1.7 | 1.7 | 1.7 | 1.7 | 1.7 | 1.7 | 1.7 |
| Histidine | 0.6 | 0.6 | 0.6 | 0.6 | 0.6 | 0.6 | 0.6 | 0.6 |
| Choline chloride | 0.5 | 0.5 | 0.5 | 0.5 | 0.5 | 0.5 | 0.5 | 0.5 |
| Cholesterol | 0.5 | 0.5 | 0.5 | 0.5 | 0.5 | 0.5 | 0.5 | 0.5 |
| Methionine 99% | 0.46 | 0.46 | 0.46 | 0.46 | 0.46 | 0.46 | 0.46 | 0.46 |
| Threonine 98.5% | 0.42 | 0.42 | 0.42 | 0.42 | 0.42 | 0.42 | 0.42 | 0.42 |
| MgHPO4+3H2O (+0.3125%) + K2CO3 (+0.1413%) | 0.4538 | 0.4538 | 0.4538 | 0.4538 | 0.4538 | 0.4538 | 0.4538 | 0.4538 |
| Stay-C | 0.25 | 0.25 | 0.25 | 0.25 | 0.25 | 0.25 | 0.25 | 0.25 |
| Carop. Pink (10%) | 0.05 | 0.05 | 0.05 | 0.05 | 0.05 | 0.05 | 0.05 | 0.05 |
| Yttrium oxide | 0.01 | 0.01 | 0.01 | 0.01 | 0.01 | 0.01 | 0.01 | 0.01 |
| CuSO4+5H2O | 0.0019 | 0.0039 | 0.0059 | 0.0078 |  |  |  |  |
| FeSO4+7 H2O | 0.0613 | 0.0946 | 0.1284 | 0.1618 |  |  |  |  |
| ZnSO4 - H2O | 0.0119 | 0.0206 | 0.0291 | 0.0378 |  |  |  |  |
| MnSO4+H2O | 0.0072 | 0.0115 | 0.0161 | 0.0204 |  |  |  |  |
| Na2SeO3 | 0.0005 | 0.00057 | 0.00068 | 0.00079 |  |  |  |  |
| Copper organic |  |  |  |  | 0.0041 | 0.0082 | 0.0124 | 0.0166 |
| Iron organic |  |  |  |  | 0.0821 | 0.1268 | 0.1721 | 0.2168 |
| Zinc organic |  |  |  |  | 0.0282 | 0.0488 | 0.0688 | 0.0895 |
| Manganese organic |  |  |  |  | 0.0155 | 0.0248 | 0.0348 | 0.0442 |
| Selenium organic |  |  |  |  | 0.01038 | 0.01288 | 0.01538 | 0.01788 |
| Sum | 100 | 100 | 100 | 100 | 100 | 100 | 100 | 100 |

Supplementary-Table 2 Chemical composition of the experimental diets used in the feeding trial of Atlantic salmon smolt

| **Diet Name** |  | **IM 1** | **IM 2** | **IM 3** | **IM 4** | **OM 1** | **OM 2** | **OM 3** | **OM 4** |
| --- | --- | --- | --- | --- | --- | --- | --- | --- | --- |
| Copper* | mg/kg | 9.3 | 13 | 19 | 24 | 9.7 | 14 | 19 | 24 |
| Iron** | mg/kg | 300±4 | 386±22 | 458±9 | 509±12 | 302±5 | 374±13 | 420±13 | 502±45 |
| Zinc** | mg/kg | 78±6 | 107±11 | 133±13 | 161±15 | 87±7 | 118±11 | 149±17 | 176±19 |
| Manganese** | mg/kg | 57±6 | 66±4 | 80±4 | 99±3 | 55±2 | 71±2 | 83±3 | 96±3 |
| Selenium** | mg/kg | 1.20±0.05 | 1.30±0.07 | 1.46±0.13 | 1.47±0.06 | 1.36±0.08 | 1.38±0.04 | 1.45±0.08 | 1.51±0.05 |
| Selenium* | mg/kg | 0.7 | 0.9 | 1.2 | 1.1 | 1.0 | 1.2 | 0.9 | 1.0 |
| Total Phosphorus*** | % | 1.2 | 1.2 | 1.2 | 1.2 | 1.1 | 1.1 | 1.2 | 1.2 |
| Yttrium* | mg/kg | 77 | 75 | 80 | 78 | 74 | 79 | 83 | 81 |
| Free astaxanthin*** | mg/kg | 40 | 42 | 42 | 40 | 40 | 40 | 40 | 40 |
| Moisture *** | % | 7.8 | 6.4 | 6.8 | 7.2 | 7.5 | 7.7 | 7.5 | 7.3 |
| Protein*** | % | 43.3 | 43.9 | 43.5 | 43.1 | 43.1 | 43.5 | 43.4 | 43.8 |
| Fat*** | % | 28.9 | 29.7 | 29.0 | 28.8 | 29.7 | 29.3 | 29.0 | 29.0 |
| Energy*** | KJ/g | 23.08 | 23.33 | 23.06 | 23.4 | 23.06 | 23.28 | 23.49 | 23.11 |
| **Fatty acids (FA) as % in Bligh & Dyer extract** | | | | | | | | | |
| 14:0 | % | 3 | 2.7 | 2.8 | 2.8 | 2.8 | 3 | 3.1 | 3.1 |
| 16:0 | % | 9.4 | 9 | 9.5 | 9 | 9.2 | 9.4 | 9.7 | 9.8 |
| 18:0 | % | 1.7 | 1.6 | 1.7 | 1.7 | 1.7 | 1.6 | 1.7 | 1.7 |
| 20:0 | % | 0.3 | 0.3 | 0.3 | 0.3 | 0.3 | 0.3 | 0.3 | 0.3 |
| 22:0 | % | 0.2 | 0.2 | 0.2 | 0.2 | 0.2 | 0.2 | 0.2 | 0.2 |
| **Total saturated fatty acids** | **%** | **14.6** | **13.8** | **14.5** | **14** | **14.2** | **14.5** | **15** | **15.1** |
| 16:1 n-7 | % | 2.7 | 2.6 | 2.7 | 2.6 | 2.7 | 2.8 | 2.9 | 2.9 |
| 18:1 (n-9)+(n-7)+(n-5) | % | 29 | 29.3 | 30.9 | 30.3 | 30.5 | 27.8 | 28 | 28.5 |
| 20:1 (n-9)+(n-7) | % | 6.6 | 6.2 | 6.3 | 6.5 | 6.6 | 6.7 | 7.1 | 7.1 |
| 22:1 (n-11)+(n-9)+(n-7) | % | 7.8 | 7.2 | 7.4 | 7.3 | 7.4 | 7.8 | 8 | 8.2 |
| 24:1 n-9 | % | 0.4 | 0.4 | 0.4 | 0.4 | 0.4 | 0.4 | 0.4 | 0.4 |
| **Total monosaturated fatty acids** | **%** | **46.5** | **45.7** | **47.7** | **47.1** | **47.6** | **45.5** | **46.4** | **47.1** |
| 16:2 n-4 | % | 0.1 | 0.1 | 0.1 | 0.1 | 0.1 | 0.1 | 0.1 | 0.1 |
| 16:3 n-4 | % | 0.1 | 0.1 | 0.1 | 0.1 | 0.1 | 0.1 | 0.1 | 0.1 |
| 18:2 n-6 | % | 12.8 | 12.9 | 13.5 | 13.2 | 13.2 | 12.3 | 12.5 | 12.6 |
| 18:3 n-6 | % | 0.1 | 0.1 | 0 | 0.1 | 0.1 | 0.1 | 0 | 0.1 |
| 20:2 n-6 | % | 0.2 | 0.1 | 0.1 | 0.1 | 0.1 | 0.2 | 0.2 | 0.2 |
| 20:3 n-6 | % | 0 | 0 | 0 | 0 | 0 | 0 | 0 | 0 |
| 20:4 n-6 | % | 0.1 | 0.1 | 0.1 | 0.1 | 0.1 | 0.1 | 0.1 | 0.2 |
| 22:4 n-6 | % | 0 | 0 | 0 | 0 | 0 | 0 | 0 | 0 |
| **Total n-6 polyunsaturated FA** | **%** | **13.2** | **13.2** | **13.7** | **13.5** | **13.5** | **12.7** | **12.8** | **13.1** |
| 18:3 n-3 | % | 4 | 4.1 | 4.3 | 4.2 | 4.3 | 3.8 | 3.8 | 3.8 |
| 18:4 n-3 | % | 1.1 | 1 | 1 | 1 | 1 | 1.1 | 1.1 | 1.1 |
| 20:3 n-3 | % | 0 | 0 | 0 | 0 | 0.1 | 0 | 0 | 0 |
| 20:4 n-3 | % | 0.2 | 0.2 | 0.2 | 0.2 | 0.2 | 0.2 | 0.2 | 0.2 |
| 20:5 n-3 (EPA) | % | 3.2 | 2.8 | 3 | 2.9 | 2.9 | 3.1 | 3.2 | 3.3 |
| 21:5 n-3 | % | 0.1 | 0.1 | 0.1 | 0.1 | 0.1 | 0.1 | 0.1 | 0.1 |
| 22:5 n-3 | % | 0.4 | 0.4 | 0.4 | 0.4 | 0.4 | 0.4 | 0.4 | 0.5 |
| 22:6 n-3 (DHA) | % | 4 | 3.7 | 3.8 | 3.7 | 3.8 | 3.9 | 4.1 | 4.1 |
| **Total n-3 polyunsaturated FA** | **%** | **13** | **12.3** | **12.8** | **12.5** | **12.8** | **12.6** | **12.9** | **13.1** |
| omega-6/omega-3 |  | 1 | 1.07 | 1.08 | 1.08 | 1.06 | 1.01 | 0.99 | 0.98 |
| EPA + DHA | % | 7.2 | 6.5 | 6.8 | 6.6 | 6.7 | 7 | 7.3 | 7.4 |
| Identified fatty acids | % | 87.5 | 85.5 | 88.9 | 87.3 | 88.3 | 85.5 | 87.3 | 88.6 |
| Unidentified fatty acids | % | 3.4 | 3.1 | 3 | 3.2 | 3.3 | 3.3 | 3.5 | 3.4 |

*Analysed at Eurofins WEJ Contaminants, Hamburg, Germany

**Analysed at Alltech Inc, Dunboyne, Ireland

***Analysed at Nofima’s

Supplementary-Table 3 Atlantic salmon growth and feed utilisation performance when fed diets (8 treatments (T)) with variable source (S) and levels (L) of trace minerals* (values are means± standard variation; n=3 tanks). Values with significant differences or trends are marked bold.

|  |  |  |  |  |  |  |  |  | **p-values*** | | | |
| --- | --- | --- | --- | --- | --- | --- | --- | --- | --- | --- | --- | --- |
|  | **IM1** | **IM2** | **IM3** | **IM4** | **OM1** | **OM2** | **OM3** | **OM4** | **T** | **S** | **L** | **S x L** |
| Start No | 55 | 55 | 55 | 55 | 55 | 55 | 55 | 55 |  |  |  |  |
| Mortality | 0 | 0 | 0 | 0 | 0 | 0 | 0 | 0 |  |  |  |  |
| Start BW (g) | 216±1 | 214±0 | 215±1 | 216±1 | 215±1 | 216±2 | 215±2 | 216±1 | 0.779 | 0.935 | 0.932 | 0.356 |
| **MBW1 (g)** | 370±8 | 370±1 | 365±19 | 361±8 | **377±5** | **385±5** | **374±12** | **372±6** | 0.150 | **0.016⭘** | 0.279 | 0.896 |
| **MBW2 (g)** | 413±8 | 412±3 | 405±23 | 405±10 | **422±8** | **432±10** | **419±16** | **411±8** | 0.191 | **0.025⭘** | 0.309 | 0.791 |
| **MBW3 (g)** | 461±10 | 455±5 | 454±25 | 448±14 | **457±12** | **482±15** | **461±16** | **459±8** | 0.258 | **0.098⭘** | 0.399 | 0.357 |
| **Final BW (g)** | 680±45 | 693±2 | 697±47 | 694±19 | **702±23** | **730±30** | **710±27** | **708±10** | 0.607 | **0.087⭘** | 0.681 | 0.879 |
| **Total SGR** | 1.38±0.08 | 1.41±0.- | 1.41±0.08 | 1.41±0.04 | **1.43±0.04** | **1.47±0.05** | **1.44±0.04** | **1.43±0.02** | 0.602 | **0.082⭘** | 0.638 | 0.935 |
| **TGC1** | 3.14±0.17 | 3.20±0.02 | 3.08±0.31 | 3.01±0.15 | **3.31±0.07** | **3.42±0.12** | **3.23±0.17** | **3.19±0.10** | 0.128 | **0.013⭘** | 0.217 | 0.986 |
| TGC2 | 5.16±0.13 | 4.97±0.40 | 4.85±0.37 | 5.29±0.66 | 5.35±0.34 | 5.40±0.57 | 5.34±0.50 | 4.72±0.25 | 0.436 | 0.475 | 0.800 | 0.171 |
| **TGC3** | **6.40b± 0.23** | **5.79b± 0.34** | **6.54b± 0.09** | **5.79b± 0.50** | **4.61a± 1.32** | **6.42b± 0.66** | **5.60ab± 0.48** | **6.39b± 0.45** | **0.023** | 0.265 | 0.527 | **0.008** |
| TGC4 | 4.18±0.70 | 4.54±0.15 | 4.63±0.24 | 4.72±0.00 | 4.65±0.12 | 4.58±0.24 | 4.69±0.12 | 4.71±0.04 | 0.408 | 0.260 | 0.316 | 0.479 |
| **Total TGC** | 3.85±0.27 | 3.95±0.01 | 3.96±0.26 | 3.94±0.13 | **4.00±0.14** | **4.15±0.17** | **4.04±0.13** | **4.02±0.07** | 0.604 | **0.083⭘** | 0.650 | 0.923 |
| **Total feed/fish** | 270±9 | 268±16 | 265±25 | 261±9 | **273±13** | **285±18** | **272±13** | **274±7** | 0.668 | **0.080⭘** | 0.719 | 0.840 |
| FCR1 | 0.83±0.02 | 0.83±0.02 | 0.82±0.02 | 0.84±0.03 | 0.80±0.05 | 0.82±0.01 | 0.81±0.02 | 0.83±0.01 | 0.626 | 0.165 | 0.366 | 0.928 |
| FCR2 | 0.59±0.03 | 0.62±0.07 | 0.58±0.03 | 0.55±0.07 | 0.55±0.01 | 0.60±0.10 | 0.56±0.05 | 0.63±0.03 | 0.537 | 0.982 | 0.610 | 0.267 |
| **FCR3** | **0.44a± 0.01** | **0.46a± 0.02** | **0.43a± 0.04** | **0.46a± 0.03** | **0.66b± 0.20** | **0.48a± 0.04** | **0.49a± 0.03** | **0.44a± 0.03** | **0.039** | **0.047⭘** | 0.231 | **0.070** |
| FCR4 | 0.56±0.12 | 0.48±0.07 | 0.49±0.01 | 0.48±0.01 | 0.48±0.01 | 0.51±0.02 | 0.48±0.01 | 0.49±0.01 | 0.436 | 0.488 | 0.465 | 0.288 |
| Total FCR DM | 0.58±0.05 | 0.56±0.03 | 0.55±0.00 | 0.55±0.01 | 0.56±0.00 | 0.56±0.01 | 0.55±0.00 | 0.56±0.01 | 0.562 | 0.661 | 0.283 | 0.577 |
| Total FE | 1.58±0.14 | 1.66±0.10 | 1.68±0.01 | 1.68±0.02 | 1.65±0.01 | 1.65±0.02 | 1.68±0.01 | 1.66±0.03 | 0.590 | 0.752 | 0.283 | 0.603 |

*Values in the same row with different small letter are significantly different (p<0.05) following Duncan’s HSD post hoc test

⭘OM>IM

Supplementary-Table 4 Atlantic salmon growth and feed utilisation performance when fed diets with added trace minerals in either inorganic (IM) or organic (OM) form at variable levels* (values are means± standard variation; n=3 tanks). Values with significant differences or trends are marked bold.

|  | **IM1** | **IM2** | **IM3** | **IM4** | **p values*** | **OM1** | **OM2** | **OM3** | **OM4** | **p values*** |
| --- | --- | --- | --- | --- | --- | --- | --- | --- | --- | --- |
| start no | 55 | 55 | 55 | 55 |  | 55 | 55 | 55 | 55 |  |
| mortality (%) | 0 | 0 | 0 | 0 |  | 0 | 0 | 0 | 0 |  |
| start bw (g) | 216±1 | 214±0 | 215±1 | 216±1 | 0.255 | 215±1 | 216±2 | 215±2 | 216±1 | 0.835 |
| MBW1 (g) | 370±8 | 370±1 | 365±19 | 361±8 | 0.729 | 377±5 | 385±5 | 374±12 | 372±6 | 0.196 |
| MBW2 (g) | 413±8 | 412±3 | 405±23 | 405±10 | 0.831 | 422±8 | 432±10 | 419±16 | 411±8 | 0.212 |
| MBW3 (g) | 461±10 | 455±5 | 454±25 | 448±14 | 0.770 | 457±12 | 482±15 | 461±16 | 459±8 | 0.164 |
| final bw (g) | 680±45 | 693±2 | 697±47 | 694±19 | 0.929 | 702±23 | 730±30 | 710±27 | 708±10 | 0.524 |
| total SGR | 1.38±0.08 | 1.41±0.00 | 1.41±0.08 | 1.41±0.04 | 0.873 | 1.43±0.04 | 1.47±0.05 | 1.44±0.04 | 1.43±0.02 | 0.611 |
| TGC1 | 3.14±0.17 | 3.20±0.02 | 3.08±0.31 | 3.01±0.15 | 0.657 | 3.31±0.07 | 3.42±0.12 | 3.23±0.17 | 3.19±0.10 | 0.180 |
| TGC2 | 5.16±0.13 | 4.97±0.40 | 4.85±0.37 | 5.29±0.66 | 0.618 | 5.35±0.34 | 5.40±0.57 | 5.34±0.50 | 4.72±0.25 | 0.254 |
| **TGC3** | **6.40ab±0.23** | **5.79a± 0.34** | **6.54b± 0.09** | **5.79a± 0.50** | **0.040** | **4.61A± 1.32** | **6.42B± 0.66** | **5.60AB± 0.48** | **6.39B± 0.45** | **0.077** |
| TGC4 | 4.18±0.70 | 4.54±0.15 | 4.63±0.24 | 4.72±0.00 | 0.385 | 4.65±0.12 | 4.58±0.24 | 4.69±0.12 | 4.71±0.04 | 0.724 |
| total TGC | 3.85±0.27 | 3.95±0.01 | 3.96±0.26 | 3.94±0.13 | 0.894 | 4.00±0.14 | 4.15±0.17 | 4.04±0.13 | 4.02±0.07 | 0.578 |
| total feed DM per FISH | 270±9 | 268±16 | 265±25 | 261±9 | 0.909 | 273±13 | 285±18 | 272±13 | 274±7 | 0.620 |
| FCR1 | 0.83±0.02 | 0.83±0.02 | 0.82±0.02 | 0.84±0.03 | 0.755 | 0.80±0.05 | 0.82±0.01 | 0.81±0.02 | 0.83±0.01 | 0.568 |
| FCR2 | 0.59±0.03 | 0.62±0.07 | 0.58±0.03 | 0.55±0.07 | 0.498 | 0.55±0.01 | 0.60±0.10 | 0.56±0.05 | 0.63±0.03 | 0.374 |
| FCR3 | 0.44± 0.01 | 0.46± 0.02 | 0.43± 0.04 | 0.46± 0.03 | 0.507 | 0.66± 0.20 | 0.48± 0.04 | 0.49± 0.03 | 0.44± 0.03 | 0.118 |
| **FCR4** | 0.56±0.12 | 0.48±0.07 | 0.49±0.01 | 0.48±0.01 | 0.415 | **0.48AB± 0.01** | **0.51B± 0.02** | **0.48A± 0.01** | **0.49 AB± 0.01** | **0.076** |
| total FCR DM | 0.58±0.05 | 0.56±0.03 | 0.55±0.00 | 0.55±0.01 | 0.475 | 0.56±0.00 | 0.56±0.01 | 0.55±0.00 | 0.56±0.01 | 0.135 |
| total FE | 1.58±0.14 | 1.66±0.10 | 1.68±0.01 | 1.68±0.02 | 0.493 | 1.65±0.01 | 1.65±0.02 | 1.68±0.01 | 1.66±0.03 | 0.128 |

*Values in the same row with different small letter are significantly different (p<0.05), whereas those with different capital letter show tendency for difference (p<0.1) following Duncan post hoc test

Supplementary-Table 5 Apparent digestibility coefficient of dietary protein, lipid, and energy, as well as ADC of P and tested minerals Cu, Fe, Zn, Se, Mn as well as their levels in the faeces of Atlantic salmon fed diets (8 treatments (T)) with variable source (S) and levels (L) of trace minerals*. Values with significant differences or trends are marked bold.

| **%** | **IM1** | **IM2** | **IM3** | **IM4** | **OM1** | **OM2** | **OM3** | **OM4** | **p-values*** | | | |
| --- | --- | --- | --- | --- | --- | --- | --- | --- | --- | --- | --- | --- |
| **T** | **S** | **L** | **S x L** |
| ADC Protein | 90.9±0.6 | 90.6±0.2 | 90.8±1.0 | 89.6±0.6 | 90.5±0.5 | 90.0±0.3 | 90.3±1.0 | 90.7±0.3 | 0.239 | 0.696 | 0.419 | 0.103 |
| ADC Fat | 96.3±0.7 | 97.4±0.3 | 97.1±0.1 | 96.9±0.6 | 96.9±0.3 | 96.8±0.7 | 96.6±0.2 | 96.5±0.4 | 0.185 | 0.290 | 0.250 | 0.153 |
| ADC Energy | 86.3±0.8 | 86.2±0.2 | 85.9±1.2 | 84.8±0.9 | 86.2±0.3 | 85.0±0.5 | 85.5±1.2 | 85.5±0.7 | 0.217 | 0.452 | 0.149 | 0.275 |
| **ADC P** | **55.7±1.4** | **51.4±2.4** | **44.9±8.9** | **42.5±3.3** | **50.8±7.6** | **48.4±2.5** | **52.1±1.4** | **50.0±5.2** | 0.108 | 0.905 | 0.207 | **0.055** |
| **ADC Cu** | **32.0±6.0c** | **17.3±2.5ab** | **23.8±2.6bc** | **13.5±8.9a** | **31.0±0.1c** | **16.6±2.0ab** | **16.3±6.5ab** | **12.1±6.5a** | **0.001** | 0.232 | **0.000** | 0.631 |
| **ADC Fe** | **12.6±3.2b** | **2.4±2.1ab** | **-3.9±3.5a** | **-3.9±7.1a** | **4.9±6.3ab** | **-3.0±2.0a** | **4.9±10.0ab** | **0.1±6.4a** | **0.033** | 0.977 | **0.023** | **0.075** |
| **ADC Zn** | **36.9±3.0d** | **27.5±0.1cd** | **24.2±11.6bc** | **11.3±7.9a** | **31.5±1.5cd** | **20.8±0.1abc** | **14.3±9.0ab** | **9.8±3.8a** | **0.000** | **0.033Ι** | **0.000** | 0.700 |
| **ADC Se** | **42.7±6.7a** | **56.4±4.6b** | **60.8±3.4b** | **56.2±3.1b** | **63.4±1.9b** | **62.6±3.0b** | **44.8±7.3a** | **47.0±4.9a** | **0.000** | 0.825 | **0.044** | **0.000** |
| **ADC Mn** | **54.2±8.8b** | **32.4±2.1a** | **11.7±5.2a** | **12.4±7.8a** | **14.6±4.6a** | **18.3±6.0a** | **10.2±3.9a** | **11.0±9.8a** | **0.006** | 0.189 | **0.002** | 0.102 |
| **Mineral level in the faeces** | | | | | | | | | | | | |
| **Cu (mg/kg)** | **25.7a** | **43.0b** | **56.7c** | **76.0e** | **27.7a** | **43.3b** | **61.0d** | **79.7e** | **0.001** | 0.753 | **0.018** | 0.490 |
| **Fe (mg/kg)** | **1066.7a** | **1366.7b** | **1666.7cd** | **1866.7d** | **1066.7a** | **1300.0b** | **1566.7c** | **1700.0d** | **0.001** | 0.494 | **0.011** | 0.267 |
| **Zn (mg/kg)** | **200.0a** | **290.0b** | **383.3c** | **520.0e** | **233.3a** | **323.3b** | **460.0d** | **580.0f** | **0.001** | 0.356 | **0.001** | 0.195 |
| **Se (mg/kg)** | **1.6abc** | **1.6ab** | **1.8cde** | **1.8bcd** | **1.5a** | **1.7abc** | **1.9cd** | **2.0d** | **0.001** | 0.475 | 0.219 | **0.047** |
| **Mn (mg/kg)** | **156.7a** | **233.3b** | **273.3c** | **310.0d** | **180.0a** | **236.7b** | **283.3c** | **296.7cd** | **0.001** | 0.798 | 0.327 | 0.199 |
| Total P (%) | 2.2 | 2.3 | 2.6 | 2.5 | 2.2 | 2.4 | 2.2 | 2.3 | 0.256 | 0.194 | 0.180 | 0.299 |

* Values in the same row with different small letter are significantly different (p<0.05) following Duncan post hoc test

ΙΙM>ΟM

Supplementary-Table 6 Blood serum metabolites in Atlantic salmon fed diets with added trace minerals in either inorganic (IM) or organic (OM) form at variable levels after handling stress (HS) and at final sampling (end)* (values are means± standard variation; n=3 tanks). Values with significant differences or trends are marked bold.

|  | | **Sampling** | **IM1** | **IM2** | **IM3** | **IM4** | **OM1** | **OM2** | **OM3** | **OM4** | **p-value*** |
| --- | --- | --- | --- | --- | --- | --- | --- | --- | --- | --- | --- |
| **Cortisol (nmol/L)** | **HS 1** | **86±26A** | **88 ±24A** | **414 ±300B** | **197 ±73AB** | **174 ±62A** | **242 ±140AB** | **133 ±60A** | **157 ±30A** | **0.095** |
| HS 2 | 205 ±91 | 259 ±203 | 198 ±101 | 189 ±123 | 148 ±80 | 140 ±34 | 283 ±202 | 107 ±27 | 0.681 |
| HS 3 | 117 ±13 | 123 ±30 | 167 ±84 | 81 ±31 | 143 ±139 | 217 ±107 | 315 ±203 | 84 ±40 | 0.162 |
| **end** | **114 ±71A** | **200 ±87AB** | **405 ±173B** | **209 ±167AB** | **287 ±33AB** | **111 ±41A** | **200 ±88AB** | **165 ±121A** | **0.077** |
| K (mmol/L) | HS1 | 0.95 ±0.44 | 0.86 ±0.41 | 0.73 ±0.44 | 0.53 ±0.03 | 1.29 ±0.62 | 0.58 ±0.19 | 0.82 ±0.28 | 0.60 ±0.10 | 0.274 |
| HS 2 | 2.14 ±1.62 | 1.10 ±0.43 | 1.06 ±0.76 | 0.80 ±0.15 | 2.21 ±1.52 | 0.81 ±0.24 | 1.76 ±1.26 | 1.36 ±1.15 | 0.539 |
| HS 3 | 0.98 ±0.77 | 0.69 ±0.19 | 0.71 ±0.40 | 0.53 ±0.03 | 0.68 ±0.04 | 0.57 ±0.15 | 0.58 ±0.17 | 0.52 ±0.04 | 0.724 |
| end | 0.82 ±0.27 | 1.50 ±0.70 | 0.77 ±0.26 | 0.71 ±0.11 | 0.84 ±0.31 | 1.26 ±0.77 | 0.67 ±0.19 | 1.04 ±0.91 | 0.508 |
| Glucose (mmol/L) | HS1 | 4.49 ±0.16 | 4.78 ±0.05 | 4.73 ±0.34 | 4.80 ±0.10 | 4.69 ±0.30 | 4.87 ±0.15 | 4.81 ±0.12 | 5.17 ±0.39 | 0.122 |
| HS 2 | 4.81 ±0.50 | 5.01 ±0.34 | 4.77 ±0.32 | 5.08 ±0.17 | 4.57 ±0.13 | 4.88 ±0.32 | 4.93 ±0.37 | 4.81 ±0.17 | 0.621 |
| HS 3 | 5.07 ±0.42 | 4.69 ±0.55 | 5.04 ±0.45 | 5.38 ±0.18 | 5.21 ±0.23 | 5.09 ±0.41 | 4.84 ±0.36 | 5.36 ±0.47 | 0.443 |
| end | 4.90 ±0.32 | 4.92 ±0.61 | 4.36 ±0.10 | 4.88 ±0.36 | 5.06 ±0.20 | 4.89 ±0.45 | 5.19 ±0.39 | 5.26 ±0.75 | 0.381 |
| Total Protein (g/L) | HS 1 | 45.0 ±2.7 | 45.2 ±0.8 | 44.1 ±2.5 | 45.5 ±4.2 | 46.5 ±2.8 | 44.6 ±4.5 | 44.5 ±3.1 | 48.9 ±5.1 | 0.745 |
| HS 2 | 46.3 ±5.6 | 46.2 ±1.1 | 44.7 ±2.7 | 49.3 ±3.9 | 48.8 ±4.9 | 51.5 ±5.7 | 52.6 ±5.0 | 50.1 ±2.1 | 0.310 |
| HS 3 | 51.4 ±4.5 | 49.2 ±3.7 | 51.9 ±4.1 | 54.1 ±2.5 | 52.2 ±3.4 | 51.0 ±1.6 | 54.1 ±6.2 | 55.7 ±1.2 | 0.502 |
| end | 55.1 ±7.3 | 51.8 ±4.1 | 55.5 ±6.7 | 49.7 ±8.3 | 52.0 ±4.7 | 48.0 ±3.9 | 56.1 ±3.4 | 55.3 ±13.0 | 0.789 |
| **Cholesterol (mmol/L)** | HS 1 | 19.4 ±1.3 | 19.2 ±3.4 | 20.1 ±1.5 | 20.9 ±0.5 | 18.6 ±1.1 | 20.0 ±0.4 | 20.6 ±0.9 | 21.1 ±0.9 | 0.503 |
| HS 2 | 20.0 ±2.9 | 19.1 ±1.2 | 20.9 ±1.8 | 19.6 ±1.8 | 20.8 ±1.1 | 20.3 ±2.2 | 21.8 ±2.9 | 21.5 ±1.1 | 0.694 |
| **HS 3** | **22.1 ±0.5ABC** | **20.2 ±1.3A** | **21.9 ±1.5ABC** | **22.3 ±0.5BC** | **20.8 ±0.2A** | **21.3 ±0.5 ABC** | **22.4 ±1.6BC** | **23.0 ±1.0C** | **0.067** |
| end | 22.9 ±0.8 | 22.8 ±0.5 | 23.4 ±0.6 | 21.9 ±1.9 | 23.0 ±0.7 | 23.1 ±0.4 | 23.8 ±0.7 | 23.1 ±2.0 | 0.671 |
| ASAT (U/L) | HS 1 | 681 ±150 | 1528 ±1344 | 1085 ±527 | 1064 ±356 | 1925 ±981 | 1262 ±448 | 872 ±305 | 1389 ±563 | 0.485 |
| HS 2 | 833 ±600 | 1638 ±1029 | 753 ±273 | 1293 ±903 | 1739 ±1415 | 2502 ±3074 | 1203 ±153 | 1233 ±401 | 0.791 |
| HS 3 | 757 ±381 | 906 ±354 | 845 ±476 | 617 ±60 | 1312 ±344 | 866 ±470 | 1186 ±652 | 870 ±329 | 0.540 |
| end | 848 ±253 | 755 ±171 | 790 ±241 | 510 ±192 | 760 ±256 | 808 ±177 | 560 ±141 | 564 ±187 | 0.340 |
| ALAT (U/L) | HS 1 | 6.0 ±1.9 | 17.4 ±18.1 | 9.3 ±4.3 | 9.1 ±3.6 | 17.8 ±8.0 | 11.2 ±2.6 | 7.3 ±2.8 | 17.4 ±14.3 | 0.543 |
| HS 2 | 6.1 ±1.7 | 10.0 ±5.9 | 7.1 ±1.6 | 8.2 ±5.8 | 13.2 ±8.1 | 19.9 ±18.0 | 9.2 ±2.7 | 7.7 ±3.2 | 0.468 |
| HS 3 | 7.8 ±4.2 | 6.1 ±1.7 | 6.1 ±2.5 | 8.6 ±4.5 | 11.1 ±1.9 | 6.7 ±3.6 | 9.1 ±3.5 | 7.0 ±3.1 | 0.563 |
| end | 8.6 ±3.0 | 9.1 ±2.9 | 8.1 ±1.4 | 4.9 ±3.9 | 8.6 ±1.9 | 8.8 ±3.0 | 5.7 ±1.8 | 5.7 ±3.0 | 0.370 |
| CK (U/L) | HS 1 | 28272 ±21792 | 172753 ±263445 | 70031 ±62185 | 61316 ±62797 | 236405 ±209799 | 66375 ±63476 | 43241 ±21164 | 168939 ±160679 | 0.524 |
| HS 2 | 49689 ±59874 | 130462 ±100306 | 23026 ±13164 | 131539 ±115902 | 175920 ±220604 | 168324 ±220547 | 63546 ±43399 | 80486 ±27935 | 0.743 |
| HS 3 | 28309 ±24861 | 49368 ±29298 | 19258 ±11553 | 17961 ±3478 | 75270 ±42511 | 38657 ±38087 | 44149 ±24689 | 46383 ±33436 | 0.326 |
| end | 23357 ±5803 | 13958 ±4041 | 17822 ±6116 | 16653 ±11278 | 15025 ±5660 | 17849 ±11874 | 16058 ±7417 | 19372 ±9781 | 0.899 |

* Values in the same row with different small letter are significantly different (p<0.05), whereas those with different capital letter show tendency for difference (p<0.1) following Duncan post hoc test

Supplementary-Table 7 Trace mineral retention efficiency (% RE) and tissue mineralisation (given in mg/kg and are means ±standard deviation, N=3 tanks) in Atlantic salmon fed diets (8 treatments (T)) with variable source (S) and levels (L) of trace minerals*.

|  | |  | | | | | | | | **p-values*** | | | |
| --- | --- | --- | --- | --- | --- | --- | --- | --- | --- | --- | --- | --- | --- |
| **IM1** | **IM2** | **IM3** | **IM4** | **OM1** | **OM2** | **OM3** | **OM4** | **T** | **S** | **L** | **S x L** |
| **% RE** | |  |  |  |  |  |  |  |  |  |  |  |  |
|  | **Cu** | **23.39 ±4.32cd** | **19.48 ±3.51bc** | **12.16 ±2.99a** | **8.13 ±1.67a** | **24.36 ±2.37d** | **18.32 ±0.21b** | **11.21 ±0.58a** | **7.44 ±1.8a** | **0.000** | 0.672 | **0.000; 1>2>3≥4** | 0.887 |
| **Fe** | **6.06 ±1.33c** | **4.86 ±0.45abc** | **4.97 ±0.26abc** | **3.51 ±0.20a** | **7.81 ±1.25d** | **5.41 ±0.39bc** | **3.98 ±0.26ab** | **4.01 ±0.98ab** | **0.000** | 0.172 | **0.000**  **1≥3,2≥4 I**  **1>2≥3=4 ⭘** | **0.057** |
| **Mn** | **4.73 ±0.87b** | **3.50 ±0.27a** | **3.45 ±0.57a** | **3.01 ±0.30a** | **5.65 ±1.12b** | **3.28 ±0.06a** | **3.31 ±0.71a** | **2.68 ±0.69a** | **0.001** | 0.878 | **0.000 1>2,3,4** | 0.378 |
| **Se** | **27.03 ±12.16abc** | **13.17 ±9.04a** | **30.59 ±8.77abc** | **19.36 ±8.50a** | **42.89 ±1.22c** | **38.84 ±13.98bc** | **21.20 ±1.01ab** | **26.15 ±13.78abc** | **0.030** | **0.027 OM>IM** | 0.200 | **0.041** |
| **Zn** | **20.55 ±7.50ab** | **28.92 ±0.86b** | **25.86 ±5.25ab** | **18.71 ±4.36a** | **29.29 ±0.35b** | **27.91 ±1.30b** | **21.82 ±1.70ab** | **18.34 ±8.66a** | **0.044** | 0.670 | **0.020**  **2≥3≥1≥4IM 1,2≥3≥4OM** | 0.157 |
| **Mineralisation** | | |  |  |  |  |  |  |  |  |  |  |  |
| **Gills** | **Cu** | 0.961ab ±0.354 | 0.948 ab ±0.233 | 0.815a ±0.073 | 1.046 ab ±0.193 | 1.158ab ±0.433 | 1.779c ±0.064 | 0.678a ±0.162 | 1.54bc ±0.659 | **0.013** | **0.021⭘** | **0.022**  **3<2, 4** | 0.112 |
| Fe | 23.5±3.5 | 29.9±10.8 | 23.6±3 | 20.2±1 | 25.1±3.5 | 26.1±3.8 | 25.7±2 | 34.7±20.9 | 0.613 | 0.325 | 0.836 | 0.344 |
| **Mn** | 6.73±1.08 | 6.88±1.11 | 6.86±0.73 | 6.42±1.03 | 6.88±0.48 | 7.22±0.95 | 5.3±1.18 | 9.42±2.92 | 0.102 | 0.397 | 0.180 | **0.071** |
| Se | 0.233±0.036 | 0.254±0.043 | 0.215±0.046 | 0.22±0.018 | 0.206±0.029 | 0.252±0.062 | 0.235±0.016 | 0.379±0.187 | 0.204 | 0.243 | 0.274 | 0.180 |
| **Zn** | 72a ±9.6 | 89.4a ±11.7 | 90.2a ±12 | 90.3a ±14 | 71.2a ±2.4 | 99.8a ±3.8 | 87.4a ±9 | 144b ±49 | **0.010** | **0.079⭘** | **0.009**  **4>1** | **0.082** |
| K | 650±177 | 830±144 | 683±58 | 611±85 | 715±204 | 771±209 | 711±156 | 828±287 | 0.747 | 0.401 | 0.671 | 0.608 |
| **Mg** | 526±92 | 541±90 | 547±58 | 475±13 | 521±17 | 592±24 | 452±61 | 715±263 | 0.188 | 0.298 | 0.449 | **0.090** |
| Na | 866±204 | 1087±137 | 964±283 | 792±64 | 899±159 | 935±218 | 860±160 | 1086±411 | 0.704 | 0.850 | 0.787 | 0.354 |
| **Ca** | 9070AB ±1289 | 9359ABC ±1076 | 9599ABC ±1244 | 8859AB ±1025 | 8890AB ±619 | 11213BC ±775 | 7570A ±1215 | 12613C ±4210 | **0.079** | 0.262 | 0.158 | **0.065** |
| **Y** | 0.045±0.003 | 0.044±0.012 | 0.036±0.009 | 0.039±0.026 | 0.071±0.034 | 0.056±0.025 | 0.062±0.018 | 0.094±0.061 | 0.290 | **0.023⭘** | 0.692 | 0.645 |
| **NQC** | Cu | 0.321±0.13 | 0.385±0.097 | 0.297±0.122 | 0.295±0.075 | 0.225±0.058 | 0.237±0.056 | 0.371±0.125 | 0.278±0.068 | 0.427 | 0.248 | 0.703 | 0.243 |
| Fe | 2.456±1.065 | 2.664±0.616 | 2.132±0.652 | 2.222±0.651 | 1.802±0.558 | 1.901±0.536 | 2.278±0.76 | 3.043±2.087 | 0.822 | 0.785 | 0.824 | 0.493 |
| Mn | 0.124±0.043 | 0.14±0.051 | 0.115±0.028 | 0.106±0.024 | 0.107±0.037 | 0.133±0.005 | 0.1±0.034 | 0.121±0.045 | 0.862 | 0.699 | 0.549 | 0.862 |
| Se | 0.145±0.014 | 0.173±0.021 | 0.129±0.011 | 0.125±0.035 | 0.125±0.05 | 0.146±0.033 | 0.179±0.051 | 0.16±0.033 | 0.377 | 0.510 | 0.598 | 0.168 |
| Zn | 4.213±1.081 | 4.765±1.412 | 4.308±0.568 | 3.684±1.332 | 3.497±1.262 | 3.931±0.797 | 4.1±1.393 | 4.47±1.272 | 0.906 | 0.619 | 0.902 | 0.629 |
| **nqc** | K | 5007±936 | 6069±1512 | 4881±842 | 4383±1151 | 4121±988 | 4363±845 | 5279±1864 | 4859±796 | 0.573 | 0.382 | 0.711 | 0.336 |
| Mg | 378±84 | 447±119 | 370±63 | 330±97 | 307±82 | 328±63 | 381±131 | 364±66 | 0.691 | 0.344 | 0.795 | 0.456 |
| Na | 544±183 | 642±179 | 506±96 | 509±177 | 406±125 | 434±91 | 498±176 | 518±110 | 0.668 | 0.168 | 0.901 | 0.533 |
| Ca | 82±41 | 122±87 | 84±30 | 70±31 | 80±36 | 88±41 | 66±22 | 85±45 | 0.883 | 0.602 | 0.663 | 0.809 |
| Y | 0.007±0.008 | 0.001±0.002 | 0.016±0.014 | 0.006±0.005 | 0.003±0.004 | 0.006±0.008 | 0.002±0.002 | 0.013±0.012 | 0.327 | 0.709 | 0.532 | 0.135 |
| **LIVER** | **Cu** | 153±58 | 192±67 | 127±51 | 113±35 | 111±37 | 179±43 | 124±9 | 102±4 | 0.161 | 0.338 | **0.037**  **2>4** | 0.871 |
| Fe | 176±71 | 201±59 | 144±49 | 134±37 | 122±31 | 184±33 | 144±12 | 128±4 | 0.278 | 0.298 | 0.111 | 0.695 |
| Mn | 2.85±1.04 | 3.12±0.71 | 2.44±0.66 | 2.17±0.62 | 2±0.56 | 2.73±0.64 | 2.03±0.26 | 2.1±0.25 | 0.297 | 0.117 | 0.185 | 0.766 |
| Se | 4.49±1.69 | 5.53±1.64 | 3.79±1.3 | 3.81±1.26 | 3.07±0.96 | 4.63±0.84 | 3.53±0.45 | 3.25±0.1 | 0.232 | 0.115 | 0.113 | 0.841 |
| Zn | 31.9±11.7 | 37±11.5 | 31.6±12.8 | 26.5±6.6 | 22.6±6.5 | 36.4±7.3 | 26.3±3.2 | 28±5.8 | 0.462 | 0.357 | 0.230 | 0.715 |
| K | 6423±2303 | 7119±2208 | 5391±2092 | 4667±1166 | 4530±1424 | 6791±1473 | 4827±714 | 4672±401 | 0.310 | 0.307 | 0.120 | 0.755 |
| Mg | 410±152 | 458±123 | 331±97 | 306±94 | 298±96 | 433±106 | 302±37 | 309±25 | 0.292 | 0.328 | 0.103 | 0.772 |
| Na | 1882±690 | 2215±738 | 1560±551 | 1543±448 | 1510±715 | 2143±713 | 1488±95 | 1468±55 | 0.533 | 0.531 | 0.179 | 0.956 |
| Ca | 122±48 | 187±97 | 122±17 | 142±68 | 106±36 | 146±63 | 83±5 | 106±20 | 0.417 | 0.143 | 0.213 | 0.975 |
| Y | 0±0 | 0.119±0.068 | 0±0 | 0.076±0.132 | 0.048±0.042 | 0.071±0.072 | 0.018±0.032 | 0.116±0.128 | 0.366 | 0.645 | 0.128 | 0.698 |
| **s pleen** | Cu | 2.15±1.31 | 2.34±2.2 | 2.05±1.79 | 3.47±1.35 | 1.95±0.89 | 2.45±2.04 | 4.2±0.17 | 2.59±0.86 | 0.558 | 0.630 | 0.544 | 0.348 |
| Fe | 178±47 | 159±31 | 166±71 | 148±33 | 152±24 | 152±46 | 141±28 | 151±36 | 0.971 | 0.429 | 0.931 | 0.912 |
| Mn | 0.92±0.32 | 1.02±0.34 | 1.03±0.51 | 1.52±0.32 | 1.01±0.34 | 1.22±0.36 | 1.34±0.09 | 1.31±0.16 | 0.347 | 0.486 | 0.158 | 0.561 |
| **Se** | 0.457±0.023 | 0.45±0.055 | 0.469±0.044 | 0.516±0.056 | 0.442±0.034 | 0.59±0.135 | 0.512±0.016 | 0.574±0.117 | 0.144 | **0.075⭘** | 0.162 | 0.351 |
| **Zn** | 51.5a ±21.5 | 73.6abc ±15.3 | 59.5ab ±23.7 | 91bc ±14.7 | 64.2ab ±17.3 | 83abc ±23.9 | 106.1c ±13.8 | 100.5c ±9.6 | **0.016** | **0.018⭘** | **0.018 4>1** | 0.254 |
| K | 3666±609 | 3064±757 | 3188±804 | 3436±602 | 3484±989 | 3688±799 | 3890±555 | 3321±320 | 0.852 | 0.385 | 0.939 | 0.584 |
| Mg | 458±129 | 468±58 | 402±118 | 493±55 | 480±138 | 489±106 | 552±48 | 468±89 | 0.790 | 0.314 | 0.997 | 0.467 |
| Na | 1519±90 | 1355±34 | 1386±170 | 1395±116 | 1423±83 | 1508±44 | 1438±125 | 1404±82 | 0.480 | 0.486 | 0.647 | 0.241 |
| Ca | 208±112 | 186±41 | 192±83 | 224±44 | 185±72 | 258±131 | 203±25 | 199±58 | 0.949 | 0.786 | 0.932 | 0.687 |
| Y | 0.033±0.02 | 0.017±0.012 | 0.039±0.014 | 0.018±0.001 | 0.015±0.007 | 0.06±0.075 | 0.018±0.004 | 0.058±0.034 | 0.421 | 0.401 | 0.815 | 0.162 |
| **KIDNEY** | Cu | 3.56±2.65 | 2.86±1.06 | 2.3±1.21 | 2.98±1.89 | 4.64±1.16 | 3.74±2.38 | 3.54±2.04 | 2.6±0.87 | 0.799 | 0.346 | 0.588 | 0.852 |
| Fe | 125±24 | 128±19 | 123±36 | 119±31 | 125±8 | 108±15 | 122±24 | 102±8 | 0.844 | 0.328 | 0.717 | 0.829 |
| Mn | 0.64±0.079 | 0.57±0.067 | 0.721±0.138 | 0.705±0.07 | 0.644±0.087 | 0.696±0.131 | 0.859±0.229 | 0.706±0.226 | 0.449 | 0.264 | 0.243 | 0.745 |
| Se | 0.446±0.142 | 0.574±0.051 | 0.551±0.079 | 0.522±0.111 | 0.552±0.033 | 0.524±0.058 | 0.455±0.104 | 0.455±0.017 | 0.414 | 0.448 | 0.623 | 0.199 |
| **Zn** | **22.1ab ±0.7** | **25.9bc ±2.4** | **25.8bc ±2.8** | **26.1bc ±0.8** | **21a ±0.7** | **26.5bc ±2.3** | **27.6c ±2.7** | **25.3bc ±3.8** | **0.037** | 0.894 | **0.005**  **1<2,3,4IM**  **1<2,3,4OM** | 0.688 |
| **K** | **4291±215** | **4265±127** | **4227±173** | **4559±431** | **4191±212** | **4309±321** | **3887±398** | **4036±84** | 0.207 | **0.055I** | 0.412 | 0.314 |
| Mg | 310±40 | 292±23 | 305±51 | 327±30 | 303±57 | 318±26 | 321±44 | 297±25 | 0.944 | 0.927 | 0.980 | 0.604 |
| Na | 1636±54 | 1572±100 | 1601±32 | 1543±108 | 1563±63 | 1619±166 | 1574±68 | 1442±76 | 0.329 | 0.318 | 0.179 | 0.544 |
| Ca | 258±105 | 182±67 | 303±127 | 285±31 | 250±68 | 294±154 | 383±55 | 293±78 | 0.408 | 0.227 | 0.260 | 0.640 |
| Y | 0.015±0.011 | 0.013±0.014 | 0.092±0.07 | 0.035±0.034 | 0.065±0.083 | 0.044±0.052 | 0.007±0.011 | 0.108±0.09 | 0.267 | 0.452 | 0.587 | 0.102 |
| **Skin** | Cu | 0.647±0.095 | 0.823±0.239 | 0.61±0.017 | 0.677±0.025 | 0.673±0.105 | 0.783±0.158 | 0.647±0.06 | 0.78±0.157 | 0.391 | 0.738 | 0.102 | 0.766 |
| Fe | 7.03±0.22 | 8.2±1.63 | 6.92±0.59 | 9.22±2.18 | 10.35±3.48 | 8.58±2.24 | 8.01±2.01 | 7.17±0.62 | 0.389 | 0.370 | 0.694 | 0.139 |
| Mn | 22.7±2.1 | 27.9±7.0 | 34.1±3.9 | 35.6±3.2 | 20.9±1.6 | 32.1±6.8 | 38.9±2 | 38.4±3.7 | 0.833 | 0.257 | 0.360 | 0.346 |
| **Se** | **0.24±0.03** | **0.343±0.121** | **0.357±0.099** | **0.217±0.04** | **0.21±0.046** | **0.307±0.031** | **0.353±0.167** | **0.243±0.085** | 0.255 | 0.883 | **0.085** | 0.948 |
| **Zn** | **5.14a ±0.19** | **4.67ab ±1.19** | **5.31bc±0.56** | **4.65bc±0.75** | **5.34a±1.17** | **4.96bc±0.57** | **4.8c±0.14** | **5.37c±0.65** | **0.000** | 0.155 | **0.000** | 0.724 |
| **WB** | **Cu** | **1.42±0.09** | **1.53±0.25** | **1.42±0.24** | **1.27±0.17** | **1.49±0.11** | **1.54±0.02** | **1.34±0.04** | **1.21±0.18** | 0.162 | 0.809 | **0.031**  **4<2** | 0.831 |
| **Fe** | 10.08±1.27 | 9.29±0.9 | 10.57±0.37 | 9.24±0.38 | 11.36±1.47 | 9.93±0.61 | 9.24±0.42 | 9.73±1.8 | 0.222 | 0.533 | 0.202 | 0.197 |
| **Mn** | 1.45±0.21 | 1.23±0.04 | 1.41±0.19 | 1.49±0.13 | 1.58±0.27 | 1.25±0.02 | 1.41±0.25 | 1.35±0.27 | 0.420 | 0.992 | 0.148 | 0.704 |
| **Se** | **0.193ABC ±0.04** | **0.143A ±0.035** | **0.213ABC ±0.035** | **0.173AB ±0.035** | **0.247C±0.006** | **0.237BC ±0.051** | **0.173AB ±0.006** | **0.2ABC ±0.056** | **0.056** | **0.044⭘** | 0.417 | **0.044** |
| **Zn** | **17.2±1.6** | **22.1±0.6** | **24±2.9** | **22.4±2.9** | **20.4±0.3** | **22.7±0.4** | **22.5±1** | **23±6** | 0.148 | 0.506 | **0.044**  **1<3IM** | 0.531 |

* Values in the same row with different small letter are significantly different (p<0.05), whereas those with different capital letter show tendency for difference (p<0.1) following Duncan post hoc test

⭘OM>IM

IIM>OM

Supplementary-Table 8 Tissue mineralisation in Atlantic salmon when fed diets with added trace minerals in either inorganic (IM) or organic (OM) form at variable levels *(values are means± standard variation; n=3 tanks). Values with significant differences or trends are marked bold.

|  |  | **IM1** | **IM2** | **IM3** | **IM4** | **p-value*** | **OM1** | **OM2** | **OM3** | **OM4** | **p-value*** |
| --- | --- | --- | --- | --- | --- | --- | --- | --- | --- | --- | --- |
| **Gills** | **Cu** | 0.961±0.354 | 0.948±0.233 | 0.815±0.073 | 1.046±0.193 | 0.696 | **1.158AB±0.433** | **1.779B±0.064** | **0.678A ±0.162** | **1.54B ±0.659** | **0.069** |
| Fe | 23.5±3.5 | 29.9±10.8 | 23.6±3 | 20.2±1 | 0.305 | 25.1±3.5 | 26.1±3.8 | 25.7±2 | 34.7±20.9 | 0.748 |
| Mn | 6.73±1.08 | 6.88±1.11 | 6.86±0.73 | 6.42±1.03 | 0.936 | 6.88±0.48 | 7.22±0.95 | 5.3±1.18 | 9.42±2.92 | 0.119 |
| Se | 0.233±0.036 | 0.254±0.043 | 0.215±0.046 | 0.22±0.018 | 0.595 | 0.206±0.029 | 0.252±0.062 | 0.235±0.016 | 0.379±0.187 | 0.288 |
| **Zn** | 72±9.6 | 89.4 ±11.7 | 90.2 ±12 | 90.3 ±14 | 0.244 | **71.2A ±2.4** | **99.8AB ±3.8** | **87.4A ±9** | **144B ±49** | **0.074** |
| K | 650±177 | 830±144 | 683±58 | 611±85 | 0.232 | 715±204 | 771±209 | 711±156 | 828±287 | 0.934 |
| Mg | 526±92 | 541±90 | 547±58 | 475±13 | 0.608 | 521±17 | 592±24 | 452±61 | 715±263 | 0.236 |
| Na | 866±204 | 1087±137 | 964±283 | 792±64 | 0.324 | 899±159 | 935±218 | 860±160 | 1086±411 | 0.775 |
| Ca | 9070 ±1289 | 9359 ±1076 | 9599 ±1244 | 8859 ±1025 | 0.871 | 8890 ±619 | 11213 ±775 | 7570 ±1215 | 12613±4210 | 0.124 |
| Y | 0.045±0.003 | 0.044±0.012 | 0.036±0.009 | 0.039±0.026 | 0.873 | 0.071±0.034 | 0.056±0.025 | 0.062±0.018 | 0.094±0.061 | 0.604 |
| **NQC** | Cu | 0.321±0.13 | 0.385±0.097 | 0.297±0.122 | 0.295±0.075 | 0.720 | 0.225±0.058 | 0.237±0.056 | 0.371±0.125 | 0.278±0.068 | 0.200 |
| Fe | 2.456±1.065 | 2.664±0.616 | 2.132±0.652 | 2.222±0.651 | 0.830 | 1.802±0.558 | 1.901±0.536 | 2.278±0.76 | 3.043±2.087 | 0.610 |
| Mn | 0.124±0.043 | 0.14±0.051 | 0.115±0.028 | 0.106±0.024 | 0.723 | 0.107±0.037 | 0.133±0.005 | 0.1±0.034 | 0.121±0.045 | 0.629 |
| Se | 0.145±0.014 | 0.173±0.021 | 0.129±0.011 | 0.125±0.035 | 0.106 | 0.125±0.05 | 0.146±0.033 | 0.179±0.051 | 0.16±0.033 | 0.504 |
| Zn | 4.213±1.081 | 4.765±1.412 | 4.308±0.568 | 3.684±1.332 | 0.725 | 3.497±1.262 | 3.931±0.797 | 4.1±1.393 | 4.47±1.272 | 0.780 |
| K | 5007±936 | 6069±1512 | 4881±842 | 4383±1151 | 0.382 | 4121±988 | 4363±845 | 5279±1864 | 4859±796 | 0.629 |
| Mg | 378±84 | 447±119 | 370±63 | 330±97 | 0.519 | 307±82 | 328±63 | 381±131 | 364±66 | 0.674 |
| Na | 544±183 | 642±179 | 506±96 | 509±177 | 0.719 | 406±125 | 434±91 | 498±176 | 518±110 | 0.562 |
| Ca | 82±41 | 122±87 | 84±30 | 70±31 | 0.671 | 80±36 | 88±41 | 66±22 | 85±45 | 0.853 |
| Y | 0.007±0.008 | 0.001±0.002 | 0.016±0.014 | 0.006±0.005 | 0.256 | 0.003±0.004 | 0.006±0.008 | 0.002±0.002 | 0.013±0.012 | 0.339 |
| **LIVER** | **Cu** | 153±58 | 192±67 | 127±51 | 113±35 | 0.357 | **111A±37** | **179B±43** | **124A±9** | **102A±4** | **0.060** |
| **Fe** | 176±71 | 201±59 | 144±49 | 134±37 | 0.476 | **122A±31** | **184B±33** | **144A±12** | **128A±4** | **0.084** |
| Mn | 2.85±1.04 | 3.12±0.71 | 2.44±0.66 | 2.17±0.62 | 0.484 | 2±0.56 | 2.73±0.64 | 2.03±0.26 | 2.1±0.25 | 0.336 |
| Se | 4.49±1.69 | 5.53±1.64 | 3.79±1.3 | 3.81±1.26 | 0.478 | 3.07±0.96 | 4.63±0.84 | 3.53±0.45 | 3.25±0.1 | 0.125 |
| Zn | 31.9±11.7 | 37±11.5 | 31.6±12.8 | 26.5±6.6 | 0.715 | 22.6±6.5 | 36.4±7.3 | 26.3±3.2 | 28±5.8 | 0.189 |
| K | 6423±2303 | 7119±2208 | 5391±2092 | 4667±1166 | 0.487 | 4530±1424 | 6791±1473 | 4827±714 | 4672±401 | 0.147 |
| Mg | 410±152 | 458±123 | 331±97 | 306±94 | 0.421 | 298±96 | 433±106 | 302±37 | 309±25 | 0.210 |
| Na | 1882±690 | 2215±738 | 1560±551 | 1543±448 | 0.531 | 1510±715 | 2143±713 | 1488±95 | 1468±55 | 0.395 |
| Ca | 122±48 | 187±97 | 122±17 | 142±68 | 0.591 | 106±36 | 146±63 | 83±5 | 106±20 | 0.360 |
| Y | 0±0 | 0.119±0.068 | 0±0 | 0.076±0.132 | 0.211 | 0.048±0.042 | 0.071±0.072 | 0.018±0.032 | 0.116±0.128 | 0.557 |
| **s pleen** | Cu | 2.15±1.31 | 2.34±2.2 | 2.05±1.79 | 3.47±1.35 | 0.726 | 1.95±0.89 | 2.45±2.04 | 4.2±0.17 | 2.59±0.86 | 0.301 |
| Fe | 178±47 | 159±31 | 166±71 | 148±33 | 0.890 | 152±24 | 152±46 | 141±28 | 151±36 | 0.953 |
| Mn | 0.92±0.32 | 1.02±0.34 | 1.03±0.51 | 1.52±0.32 | 0.282 | 1.01±0.34 | 1.22±0.36 | 1.34±0.09 | 1.31±0.16 | 0.850 |
| Se | 0.457±0.023 | 0.45±0.055 | 0.469±0.044 | 0.516±0.056 | 0.359 | 0.442±0.034 | 0.59±0.135 | 0.512±0.016 | 0.574±0.117 | 0.460 |
| Zn | 51.5±21.5 | 73.6±15.3 | 59. ±23.7 | 91 ±14.7 | 0.138 | 64.2 ±17.3 | 83 ±23.9 | 106.1±13.8 | 100.5c ±9.6 | 0.164 |
| K | 3666±609 | 3064±757 | 3188±804 | 3436±602 | 0.731 | 3484±989 | 3688±799 | 3890±555 | 3321±320 | 0.556 |
| Mg | 458±129 | 468±58 | 402±118 | 493±55 | 0.702 | 480±138 | 489±106 | 552±48 | 468±89 | 0.492 |
| Na | 1519±90 | 1355±34 | 1386±170 | 1395±116 | 0.367 | 1423±83 | 1508±44 | 1438±125 | 1404±82 | 0.511 |
| Ca | 208±112 | 186±41 | 192±83 | 224±44 | 0.922 | 185±72 | 258±131 | 203±25 | 199±58 | 0.799 |
| Y | 0.033±0.02 | 0.017±0.012 | 0.039±0.014 | 0.018±0.001 | 0.196 | 0.015±0.007 | 0.06±0.075 | 0.018±0.004 | 0.058±0.034 | 0.550 |
| **KIDNEY** | Cu | 3.56±2.65 | 2.86±1.06 | 2.3±1.21 | 2.98±1.89 | 0.865 | 4.64±1.16 | 3.74±2.38 | 3.54±2.04 | 2.6±0.87 | 0.511 |
| Fe | 125±24 | 128±19 | 123±36 | 119±31 | 0.985 | 125±8 | 108±15 | 122±24 | 102±8 | 0.444 |
| Mn | 0.64±0.079 | 0.57±0.067 | 0.721±0.138 | 0.705±0.07 | 0.255 | 0.644±0.087 | 0.696±0.131 | 0.859±0.229 | 0.706±0.226 | 0.671 |
| Se | 0.446±0.142 | 0.574±0.051 | 0.551±0.079 | 0.522±0.111 | 0.480 | 0.552±0.033 | 0.524±0.058 | 0.455±0.104 | 0.455±0.017 | 0.386 |
| **Zn** | **22.1A ±0.7** | **25.9B ±2.4** | **25.8B ±2.8** | **26.1B ±0.8** | **0.092** | 21±0.7 | 26.5 ±2.3 | 27.6±2.7 | 25.3 ±3.8 | 0.164 |
| K | 4291±215 | 4265±127 | 4227±173 | 4559±431 | 0.447 | 4191±212 | 4309±321 | 3887±398 | 4036±84 | 0.295 |
| Mg | 310±40 | 292±23 | 305±51 | 327±30 | 0.722 | 303±57 | 318±26 | 321±44 | 297±25 | 0.578 |
| Na | 1636±54 | 1572±100 | 1601±32 | 1543±108 | 0.562 | 1563±63 | 1619±166 | 1574±68 | 1442±76 | 0.263 |
| Ca | 258±105 | 182±67 | 303±127 | 285±31 | 0.423 | 250±68 | 294±154 | 383±55 | 293±78 | 0.616 |
| Y | 0.015±0.011 | 0.013±0.014 | 0.092±0.07 | 0.035±0.034 | 0.129 | 0.065±0.083 | 0.044±0.052 | 0.007±0.011 | 0.108±0.09 | 0.398 |
| **Skin** | Cu | 0.647±0.095 | 0.823±0.239 | 0.61±0.017 | 0.677±0.025 | 0.259 | 0.673±0.105 | 0.783±0.158 | 0.647±0.06 | 0.78±0.157 | 0.375 |
| Fe | 7.03±0.22 | 8.2±1.63 | 6.92±0.59 | 9.22±2.18 | 0.222 | 10.35±3.48 | 8.58±2.24 | 8.01±2.01 | 7.17±0.62 | 0.464 |
| **Mn** | **22.7a ±2.1** | **27.9ab ±7.0** | **34.1b ±3.9** | **35.6b ±3.2** | **0.026** | **20.9 a±1.6** | **32.1b±6.8** | **38.9b ±2** | **38.4b ±3.7** | **0.011** |
| **Se** | 0.24±0.03 | 0.343±0.121 | 0.357±0.099 | 0.217±0.04 | 0.162 | 0.21±0.046 | 0.307±0.031 | 0.353±0.167 | 0.243±0.085 | 0.514 |
| Zn | 5.14 ±0.19 | 4.67 ±1.19 | 5.31±0.56 | 4.65±0.75 | 0.647 | 5.34±1.17 | 4.96±0.57 | 4.8±0.14 | 5.37±0.65 | 0.165 |
| **WB** | **Cu** | 1.42±0.09 | 1.53±0.25 | 1.42±0.24 | 1.27±0.17 | 0.484 | **1.49ab±0.11** | **1.54b±0.02** | **1.34ab±0.04** | **1.21a±0.18** | **0.030** |
| Fe | 10.08±1.27 | 9.29±0.9 | 10.57±0.37 | 9.24±0.38 | 0.218 | 11.36±1.47 | 9.93±0.61 | 9.24±0.42 | 9.73±1.8 | 0.618 |
| Mn | 1.45±0.21 | 1.23±0.04 | 1.41±0.19 | 1.49±0.13 | 0.260 | 1.58±0.27 | 1.25±0.02 | 1.41±0.25 | 1.35±0.27 | 0.511 |
| Se | 0.193±0.04 | 0.143±0.035 | 0.213 ±0.035 | 0.173±0.035 | 0.179 | 0.247±0.006 | 0.237 ±0.051 | 0.173 ±0.006 | 0.2 ±0.056 | 0.245 |
| **Zn** | **17.2a±1.6** | **22.1ab±0.6** | **24b±2.9** | **22.4b±2.9** | **0.028** | 20.4±0.3 | 22.7±0.4 | 22.5±1 | 23±6 | 0.827 |

* Values in the same row with different small letter are significantly different (p<0.05), whereas those with different capital letter show tendency for difference (p<0.1) following Duncan post hoc test

Supplementary-Table 9 Whole body (WB) (round/wet) total lipids (Bligh and Dyer extract) and fatty acid content (as % of whole body) of Atlantic salmon fed diets (8 treatments (T)) with variable source (S) and levels (L) of trace minerals* (values are means± standard variation; n=3 tanks)

|  | **IM1** | **IM2** | **IM3** | **IM4** | **OM1** | **OM2** | **OM3** | **OM4** | **p-values** | | | |
| --- | --- | --- | --- | --- | --- | --- | --- | --- | --- | --- | --- | --- |
| **T** | **S** | **L** | **S x L** |
| **WB B&D extract** | 14.33±0.33 | 14.78±0.20 | 14.72±0.55 | 14.18±0.38 | 15.10±0.27 | 14.63±1.06 | 14.17±0.13 | 14.29±0.44 | 0.297 | 0.835 | 0.314 | 0.185 |
| **14:0** | **0.39±0.01** | **0.37±0.01** | **0.38±0.03** | **0.38±0.01** | **0.39±0.01** | **0.40±0.03** | **0.40±0.01** | **0.40±0.04** | 0.514 | **0.036⭘** | 0.993 | 0.765 |
| **16:0** | 1.61±0.02 | 1.61±0.03 | 1.60±0.14 | 1.60±0.04 | 1.67±0.03 | 1.67±0.12 | 1.66±0.04 | 1.62±0.11 | 0.860 | 0.150 | 0.897 | 0.973 |
| **18:0** | 0.33±0.01 | 0.33±0.00 | 0.33±0.04 | 0.33±0.01 | 0.35±0.01 | 0.35±0.03 | 0.34±0.01 | 0.33±0.03 | 0.944 | 0.452 | 0.849 | 0.871 |
| **20:0** | 0.04±0.01 | 0.03±0.00 | 0.03±0.00 | 0.04±0.01 | 0.04±0.01 | 0.04±0.01 | 0.03±0.01 | 0.03±0.01 | 0.589 | 0.651 | 0.588 | 0.353 |
| **22:0** | 0.01±0.00 | 0.01±0.00 | 0.01±0.00 | 0.01±0.00 | 0.02±0.00 | 0.01±0.00 | 0.01±0.00 | 0.01±0.00 | 0.297 | 0.835 | 0.314 | 0.185 |
| **saturated FA** | 2.38±0.04 | 2.36±0.05 | 2.38±0.19 | 2.36±0.05 | 2.46±0.05 | 2.48±0.19 | 2.45±0.06 | 2.39±0.19 | 0.864 | 0.159 | 0.915 | 0.944 |
| **16:1 n-7** | **0.38±0.00** | **0.38±0.01** | **0.38±0.03** | **0.38±0.00** | **0.39±0.01** | **0.41±0.03** | **0.41±0.02** | **0.40±0.03** | 0.415 | **0.029⭘** | 0.781 | 0.860 |
| **18:1 (n-9)+(n-7)+(n-5)** | **4.36±0.08** | **4.52±0.08** | **4.49±0.34** | **4.51±0.09** | **4.68±0.11** | **4.51±0.35** | **4.29±0.07** | **4.23±0.38** | 0.351 | 0.650 | 0.556 | 0.149 |
| **20:1 (n-9)+(n-7)** | **0.86±0.02** | **0.88±0.02** | **0.86±0.06** | **0.88±0.03** | **0.91±0.03** | **0.96±0.06** | **0.92±0.02** | **0.91±0.07** | 0.201 | **0.011⭘** | 0.549 | 0.820 |
| **22:1(n-11)+(n-9)+(n-7)** | **0.79±0.02** | **0.78±0.02** | **0.76±0.06** | **0.76±0.01** | **0.79±0.05** | **0.85±0.04** | **0.84±0.01** | **0.81±0.05** | 0.059 | **0.003⭘** | 0.517 | 0.356 |
| **24:1 n-9** | **0.06±0.01** | **0.06±0.00** | **0.06±0.00** | **0.06±0.00** | **0.06±0.00** | **0.07±0.01** | **0.07±0.01** | **0.06±0.01** | 0.299 | **0.050⭘** | 0.620 | 0.421 |
| **monounsaturated** **FA** | 6.45±0.05 | 6.63±0.14 | 6.56±0.49 | 6.59±0.12 | 6.84±0.18 | 6.80±0.49 | 6.53±0.11 | 6.41±0.55 | 0.715 | 0.529 | 0.677 | 0.490 |
| **16:2 n-4** | 0.01±0.00 | 0.01±0.00 | 0.01±0.00 | 0.01±0.00 | 0.02±0.00 | 0.01±0.00 | 0.02±0.01 | 0.02±0.01 | 0.662 | 0.175 | 0.713 | 0.665 |
| **18:2 n-6** | 1.58±0.04 | 1.66±0.05 | 1.65±0.12 | 1.64±0.05 | 1.72±0.04 | 1.65±0.09 | 1.58±0.04 | 1.56±0.12 | 0.277 | 0.836 | 0.578 | **0.093** |
| **18:3 n-6** | 0.01±0.00 | 0.01±0.00 | 0.01±0.00 | 0.01±0.00 | 0.02±0.00 | 0.01±0.00 | 0.01±0.00 | 0.01±0.00 | 0.297 | 0.835 | 0.314 | 0.185 |
| **20:2 n-6** | 0.14±0.01 | 0.14±0.01 | 0.14±0.01 | 0.14±0.00 | 0.15±0.01 | 0.15±0.01 | 0.14±0.00 | 0.09±0.07 | 0.145 | 0.304 | 0.166 | 0.151 |
| **20:3 n-6** | 0.03±0.00 | 0.03±0.00 | 0.03±0.01 | 0.03±0.00 | 0.03±0.00 | 0.03±0.00 | 0.03±0.00 | 0.03±0.00 | 0.472 | 0.430 | 0.550 | 0.289 |
| **20:4 n-6** | 0.03±0.00 | 0.03±0.00 | 0.03±0.00 | 0.02±0.01 | 0.03±0.01 | 0.03±0.00 | 0.03±0.00 | 0.03±0.00 | 0.545 | 0.994 | 0.467 | 0.358 |
| **PUFA (n-6) FA** | 1.79±0.04 | 1.88±0.05 | 1.87±0.14 | 1.86±0.05 | 1.93±0.05 | 1.87±0.11 | 1.79±0.04 | 1.77±0.14 | 0.376 | 0.845 | 0.637 | 0.138 |
| **18:3 n-3** | 0.46±0.01 | 0.48±0.02 | 0.48±0.03 | 0.48±0.02 | 0.51±0.02 | 0.48±0.02 | 0.45±0.01 | 0.45±0.04 | 0.118 | 0.736 | 0.369 | **0.040** |
| **18:4 n-3** | 0.10±0.00 | 0.10±0.01 | 0.10±0.01 | 0.09±0.01 | 0.10±0.02 | 0.10±0.01 | 0.10±0.01 | 0.10±0.01 | 0.800 | 0.321 | 0.939 | 0.537 |
| **20:3 n-3** | 0.04±0.00 | 0.04±0.01 | 0.04±0.00 | 0.04±0.00 | 0.05±0.00 | 0.04±0.00 | 0.04±0.00 | 0.04±0.00 | 0.546 | 0.309 | 0.588 | 0.413 |
| **20:4 n-3** | 0.11±0.00 | 0.11±0.01 | 0.11±0.01 | 0.10±0.00 | 0.11±0.01 | 0.12±0.01 | 0.11±0.01 | 0.10±0.01 | 0.369 | 0.706 | 0.241 | 0.359 |
| **20:5 n-3 (EPA)** | 0.28±0.01 | 0.27±0.01 | 0.27±0.02 | 0.26±0.01 | 0.28±0.00 | 0.29±0.01 | 0.29±0.01 | 0.28±0.02 | 0.073 | **0.003⭘** | 0.780 | 0.418 |
| **21:5 n-3** | 0.01±0.00 | 0.01±0.00 | 0.01±0.00 | 0.01±0.00 | 0.02±0.00 | 0.01±0.00 | 0.01±0.00 | 0.01±0.00 | 0.297 | 0.835 | 0.314 | 0.185 |
| **22:5 n-3** | 0.12±0.01 | 0.12±0.00 | 0.12±0.00 | 0.11±0.00 | 0.12±0.00 | 0.13±0.01 | 0.13±0.01 | 0.12±0.01 | 0.510 | **0.049⭘** | 0.842 | 0.772 |
| **22:6 n-3 (DHA)** | 0.69±0.03 | 0.67±0.02 | 0.66±0.04 | 0.64±0.00 | 0.68±0.01 | 0.70±0.03 | 0.69±0.01 | 0.70±0.05 | 0.176 | **0.026⭘** | 0.659 | 0.269 |
| **PUFA (n-3) FA** | 1.82±0.05 | 1.80±0.06 | 1.79±0.12 | 1.75±0.03 | 1.85±0.05 | 1.87±0.08 | 1.83±0.03 | 1.82±0.14 | 0.652 | 0.105 | 0.631 | 0.946 |
| **total-PUFA FA** | 3.62±0.08 | 3.69±0.12 | 3.68±0.26 | 3.62±0.07 | 3.80±0.09 | 3.76±0.19 | 3.64±0.08 | 3.61±0.29 | 0.813 | 0.471 | 0.663 | 0.705 |
| **omega-6/omega-3 ratio** | **0.98±0.02a** | **1.04±0.01b** | **1.04±0.02b** | **1.06±0.02b** | **1.04±0.01b** | **1.00±0.02a** | **0.98±0.01a** | **0.97±0.01a** | **0.000** | **0.000I** | 0.590 | **0.000** |
| **EPA + DHA** | **0.96±0.03** | **0.94±0.03** | **0.93±0.06** | **0.90±0.01** | **0.96±0.01** | **0.99±0.04** | **0.99±0.01** | **0.98±0.07** | 0.141 | **0.011⭘** | 0.690 | 0.368 |
| **identified FA** | 12.46±0.15 | 12.68±0.30 | 12.61±0.94 | 12.57±0.25 | 13.09±0.31 | 13.04±0.87 | 12.61±0.24 | 12.41±1.02 | 0.818 | 0.410 | 0.732 | 0.685 |
| **unidentified FA** | 0.53±0.08 | 0.48±0.02 | 0.50±0.03 | 0.54±0.07 | 0.50±0.04 | 0.53±0.02 | 0.55±0.05 | 0.52±0.07 | 0.771 | 0.651 | 0.826 | 0.437 |

*Values in the same row with different small letter are significantly different (p<0.05), following Duncan post hoc test.

Supplementary-Table 10 Biometrics, welfare, and technical fillet quality of Atlantic salmon post smolts, fed diets with variable source (organic or inorganic) and levels of trace minerals*

|  | **IM1** | **IM2** | **IM3** | **IM4** | **p-value*** | **OM1** | **OM2** | **OM3** | **OM4** | **p-value*** |
| --- | --- | --- | --- | --- | --- | --- | --- | --- | --- | --- |
| **Biometrics** |  |  |  |  |  |  |  |  |  |  |
| BW fish | 637.3±5.9 | 630.2±4 | 629.2±4.9 | 629.7±4.9 | ns | 632±5.1 | 630.3±6.4 | 640.6±4.1 | 646.8±5.5 | ns |
| BW bled out | 629.4±5.9 | 623.2±4 | 619.4±4.9 | 620.1±4.5 | ns | 623.7±5.1 | 619.6±6.3 | 631.4±4.1 | 636.4±5.3 | ns |
| **Gutted BW** | 566.5±5.5 | 564.1±3.7 | 559.9±4.6 | 559.8±3.4 | ns | **565.4±4.5AB** | **560.3±6.6A** | **573.4±4.4AB** | **578.6±5.2B** | **0.074** |
| Slaughter yield (%) | 89.1±0.2 | 89.5±0.2 | 89±0.2 | 88.9±0.3 | ns | 89.5±0.1 | 89.2±0.3 | 89.5±0.2 | 89.4±0.2 | ns |
| **Fillet yield, round W (%)** | **69±0.5b** | **69.4±0.4b** | **68.8±0.6b** | **67.4±0.5a** | **0.032** | 69.1±0.3 | 68.5±0.4 | 69.3±0.4 | 69.9±0.5 | ns |
| **Fillet yield, Gutted W (%)** | **77.2±0.5AB** | **77.5±0.4B** | **77.3±0.6B** | **75.7±0.5A** | **0.068** | 77.3±0.4 | 77±0.4 | 77.4±0.5 | 78.1±0.5 | ns |
| Length (cm) | 35.3±0.2 | 35.3±0.2 | 35.2±0.2 | 35.3±0.1 | ns | 35.5±0.2 | 35.2±0.2 | 35.8±0.2 | 35.8±0.1 | ns |
| Condition factor, round W | 1.44±0.02 | 1.44±0.03 | 1.45±0.02 | 1.43±0.02 | ns | 1.42±0.02 | 1.45±0.02 | 1.4±0.01 | 1.41±0.02 | ns |
| Condition factor, gutted W | 1.28±0.01 | 1.29±0.02 | 1.29±0.02 | 1.27±0.01 | ns | 1.27±0.02 | 1.3±0.02 | 1.25±0.01 | 1.26±0.01 | ns |
| HSI | 1.15±0.03 | 1.07±0.02 | 1.08±0.02 | 1.16±0.05 | ns | 1.07±0.02 | 1.07±0.04 | 1.05±0.02 | 1.1±0.03 | ns |
| **Welfare** |  |  |  |  |  |  |  |  |  |  |
| Cataract, sum | 0.7±0.2 | 0.3±0.1 | 0.3±0.2 | 0.5±0.2 | ns | 0.2±0.1 | 0.4±0.2 | 0.1±0.1 | 0.7±0.3 | ns |
| Fin score (0-3) | 1.7±0.2 | 1±0.3 | 1.7±0.3 | 1.7±0.2 | ns | 1.2±0.2 | 1.5±0.2 | 1.6±0.3 | 1.3±0.2 | ns |
| Liver score (0-5) | 3.6±0.1 | 3.2±0.2 | 3.4±0.2 | 3.6±0.2 | ns | 3.3±0.2 | 3.5±0.1 | 3.6±0.1 | 3.7±0.2 | ns |
| Viscera fat score(0-5) | 2.4±0.2 | 2.6±0.2 | 2.4±0.3 | 2.3±0.2 | ns | 2.3±0.2 | 2.1±0.2 | 1.9±0.1 | 2.2±0.2 | ns |
| **Bone strength, force at 15% thickness (N)** | 41±2.1 | 39.6±1.3 | 41.1±1.6 | 38.4±1.4 | ns | **39.1±1.3ab** | **36.7±1.8a** | **41.2±1.5b** | **42.5±1.3b** | **0.039** |
| Bone strength, force at 50% thickness (N) | 74±3.3 | 70.5±3.4 | 72.2±3.1 | 76.9±2.3 | ns | 76±2.4 | 70.8±2.2 | 77.5±2.9 | 78.9±2.7 | ns |
| **Technical quality** |  |  |  |  |  |  |  |  |  |  |
| **pH** | 6.24±0.02 | 6.29±0.01 | 6.26±0.02 | 6.25±0.02 | ns | 6.26±0.02 | 6.25±0.02 | 6.24±0.01 | 6.27±0.02 | ns |
| Gaping, fresh fillet (0-5) | 0.8±0.2 | 0.3±0.1 | 0.5±0.2 | 0.6±0.2 | ns | 0.7±0.2 | 0.6±0.2 | 0.8±0.2 | 0.5±0.2 | ns |
| **Gaping after thawing (0-5)** | 1.1±0.3 | 1.4±0.3 | 0.5±0.2 | 1.1±0.4 | ns | **0.8±0.2a** | **1.1±0.3ab** | **1.9±0.3b** | **0.5±0.3a** | **0.0079** |
| Fillet firmness, breaking force (N) | 3.3±0.1 | 3.4±0.1 | 3.7±0.2 | 3.5±0.1 | ns | 3.5±0.1 | 3.5±0.1 | 3.3±0.1 | 3.6±0.1 | ns |
| **Fillet firmness, total work (N*sec)** | **52.8±2.3a** | **53.7±1.7a** | **59.9±1.9b** | **52.8±2ab** | **0.012** | 54.6±1 | 52.4±1.4 | 54.6±1.1 | 59.2±2.2 | ns |
| **Liquid loss (%)** | **4.1±0.3a** | **4.4±0.3a** | **3.7±0.3a** | **4.9±0.3b** | **0.035** | **4.6±0.2b** | **3.7±0.3a** | **4.7±0.2b** | **3.6±0.2a** | **0.0014** |
| Skin strength, puncture force (N) | 2.5±0.1 | 2.7±0.2 | 2.8±0.2 | 2.6±0.2 | ns | 2.8±0.1 | 2.8±0.1 | 2.8±0.2 | 2.9±0.2 | ns |
| SalmonFan, score | 21.9±0.1 | 22.2±0.2 | 22.1±0.2 | 22±0.2 | ns | 21.8±0.2 | 22.1±0.2 | 22±0.1 | 22.2±0.1 | ns |
| Muscle_L | 42.5±0.4 | 42.6±0.3 | 42.8±0.4 | 42.9±0.4 | ns | 42.3±0.3 | 42.6±0.3 | 42.1±0.3 | 42.2±0.3 | ns |
| Muscle_a | 6.6±0.3 | 7.3±0.3 | 6.9±0.3 | 6.6±0.3 | ns | 6.8±0.3 | 6.6±0.4 | 6.6±0.3 | 6.6±0.3 | ns |
| Muscle_b | 9.6±0.3 | 10.8±0.3 | 10.6±0.4 | 10.1±0.4 | ns | 10.3±0.4 | 10.1±0.5 | 9.6±0.4 | 9.8±0.3 | ns |
| Muscle_Chroma | 11.7±0.4 | 13±0.4 | 12.7±0.5 | 12.1±0.5 | ns | 12.4±0.5 | 12.1±0.6 | 11.7±0.5 | 11.8±0.4 | ns |
| **Skin_L** | **77.6±1.4b** | **71.2±1.8a** | **71.2±1.9a** | **76.8±1.3b** | **0.008** | 76±1.4 | 79.3±1.2 | 76.6±1.8 | 79.5±1.1 | ns |
| Skin_a | -0.8±0.2 | -0.7±0.2 | -1±0.2 | -0.6±0.2 | ns | -0.1±0.2 | -0.5±0.2 | -0.7±0.2 | -0.5±0.2 | ns |
| Skin_b | 2±0.4 | 1.1±0.4 | 2.1±0.4 | 1.8±0.4 | ns | 0.8±0.4 | 1.2±0.5 | 0.9±0.4 | 0.7±0.3 | ns |
| Skin_Chroma | 2.3±0.3 | 1.9±0.3 | 2.6±0.3 | 2.2±0.4 | ns | 1.6±0.2 | 1.9±0.4 | 1.8±0.3 | 1.4±0.2 | ns |

*Values in the same row with different small letter are significantly different (p<0.05), whereas those with different capital letter show tendency for difference (p<0.1) following Duncan post hoc test

Supplementary-Table 11 Comparison of Atlantic salmon post-smolt biometrics, welfare and quality scores fed either inorganic or organic trace mineral premix in the diet*.

|  | **IM** | **OM** | **p-value** |
| --- | --- | --- | --- |
| Sex | 0.5 ± 0.1 | 0.6 ± 0.1 | ns |
| **Biometrics** |  |  |  |
| Body weigth (g) | 631.6 ± 2.5 | 637.4 ± 2.7 | ns |
| Body weigth, bled (g) | 623 ± 2.4 | 627.8 ± 2.7 | ns |
| **Blood loss (%)** | **1.4 ± 0.1** | **1.5 ± 0** | **0.069** |
| **Gutted body weight (g)** | **562.5 ± 2.2** | **569.6 ± 2.7** | **0.043** |
| **Slaughter yield (%)** | **89.1 ± 0.1** | **89.4 ± 0.1** | **0.000** |
| **Fillet yield, round weight (%)** | **68.6 ± 0.3** | **69.2 ± 0.2** | **0.084** |
| Fillet yield, gutted weight (%) | 76.9 ± 0.3 | 77.4 ± 0.2 | ns |
| **Length (cm)** | **35.3 ± 0.1** | **35.6 ± 0.1** | **0.033** |
| Condition factor, round weight | 1.44 ± 0.01 | 1.42 ± 0.01 | ns |
| Condition factor, gutted weight | 1.28 ± 0.01 | 1.27 ± 0.01 | ns |
| Liver weight (g) | 7 ± 0.1 | 6.8 ± 0.1 | ns |
| **HSI** | **1.11 ± 0.02** | **1.07 ± 0.02** | **0.060** |
| **Welfare** |  |  |  |
| Left eye cataract score | 0.2 ± 0 | 0.1 ± 0.1 | ns |
| Right eye cataract score | 0.3 ± 0.1 | 0.2 ± 0.1 | ns |
| Cataract, sum | 0.5 ± 0.1 | 0.4 ± 0.1 | ns |
| Liver score (0-5) | 3.5 ± 0.1 | 3.5 ± 0.1 | ns |
| **Viscera fat score (0-5)** | **2.4 ± 0.1** | **2.1 ± 0.1** | **0.049 (one-sided)** |
| Fin score (0-3) | 1.5 ± 0.1 | 1.4 ± 0.1 | ns |
| **Quality** |  |  |  |
| pH | 6.26 ± 0.01 | 6.25 ± 0.01 | ns |
| Nice_fillet_g | 216.8 ± 1.2 | 220.5 ± 1.2 | ns |
| Gaping, fresh fillet (0-5) | 0.6 ± 0.1 | 0.7 ± 0.1 | ns |
| Gaping after thawing (0-5) | 1.1 ± 0.2 | 1.1 ± 0.2 | ns |
| Water holding capacity (%) | 4.3 ± 0.2 | 4.2 ± 0.1 | ns |
| Fillet firmness, breaking force (N) | 3.5 ± 0.1 | 3.5 ± 0.1 | ns |
| Area0_Fb_nks | 6.1 ± 0.2 | 6.1 ± 0.1 | ns |
| Fillet firmness, total work (N*sec) | 54.8 ± 1 | 55.2 ± 0.8 | ns |
| mm_nks | 15.5 ± 0.1 | 15.4 ± 0.1 | ns |
| Skin strength, puncture force (N) | 2.7 ± 0.1 | 2.8 ± 0.1 | ns |
| Max_force_X | 88.4 ± 1.9 | 87.6 ± 1.6 | ns |
| Strain_Max_force_X | 58.4 ± 1 | 55.4 ± 0.9 | ns |
| F70_X | 73.3 ± 3 | 71.6 ± 2.3 | ns |
| Area_70perc_sec_X | 98.1 ± 2 | 99.8 ± 1.8 | ns |
| Area_70perc_mm_X | 194.9 ± 3.9 | 198.1 ± 3.7 | ns |
| Area_15perc_sec_X | 8.4 ± 0.1 | 8.4 ± 0.1 | ns |
| Area_15perc_mm_X | 16.3 ± 0.2 | 16.3 ± 0.2 | ns |
| Bone strength, force at 15% thickness (N) | 40.1 ± 0.8 | 39.9 ± 0.8 | ns |
| Area_50perc_sec_X | 61.9 ± 1.1 | 63.2 ± 1.1 | ns |
| Area_50perc_mm_X | 122.5 ± 2.2 | 125.2 ± 2.2 | ns |
| Bone strength, force at 50% thickness(N) | 73.3 ± 1.5 | 75.8 ± 1.3 | ns |
| Thickness_X | 5.1 ± 0 | 5.1 ± 0 | ns |
| Vekt_thaw | 207.6 ± 1.2 | 211.6 ± 1.1 | ns |
| SalmonFan, score | 22.1 ± 0.1 | 22 ± 0.1 | ns |
| **Muscle_L** | **42.7 ± 0.2** | **42.3 ± 0.1** | **0.098** |
| Muscle_a | 6.8 ± 0.2 | 6.7 ± 0.2 | ns |
| Muscle_b | 10.3 ± 0.2 | 9.9 ± 0.2 | ns |
| Muscle_Hue | 56.6 ± 0.4 | 56.3 ± 0.3 | ns |
| Muscle_Chroma | 12.4 ± 0.2 | 12 ± 0.3 | ns |
| **Skin_L** | **74.2 ± 0.9** | **77.9 ± 0.7** | **0.002** |


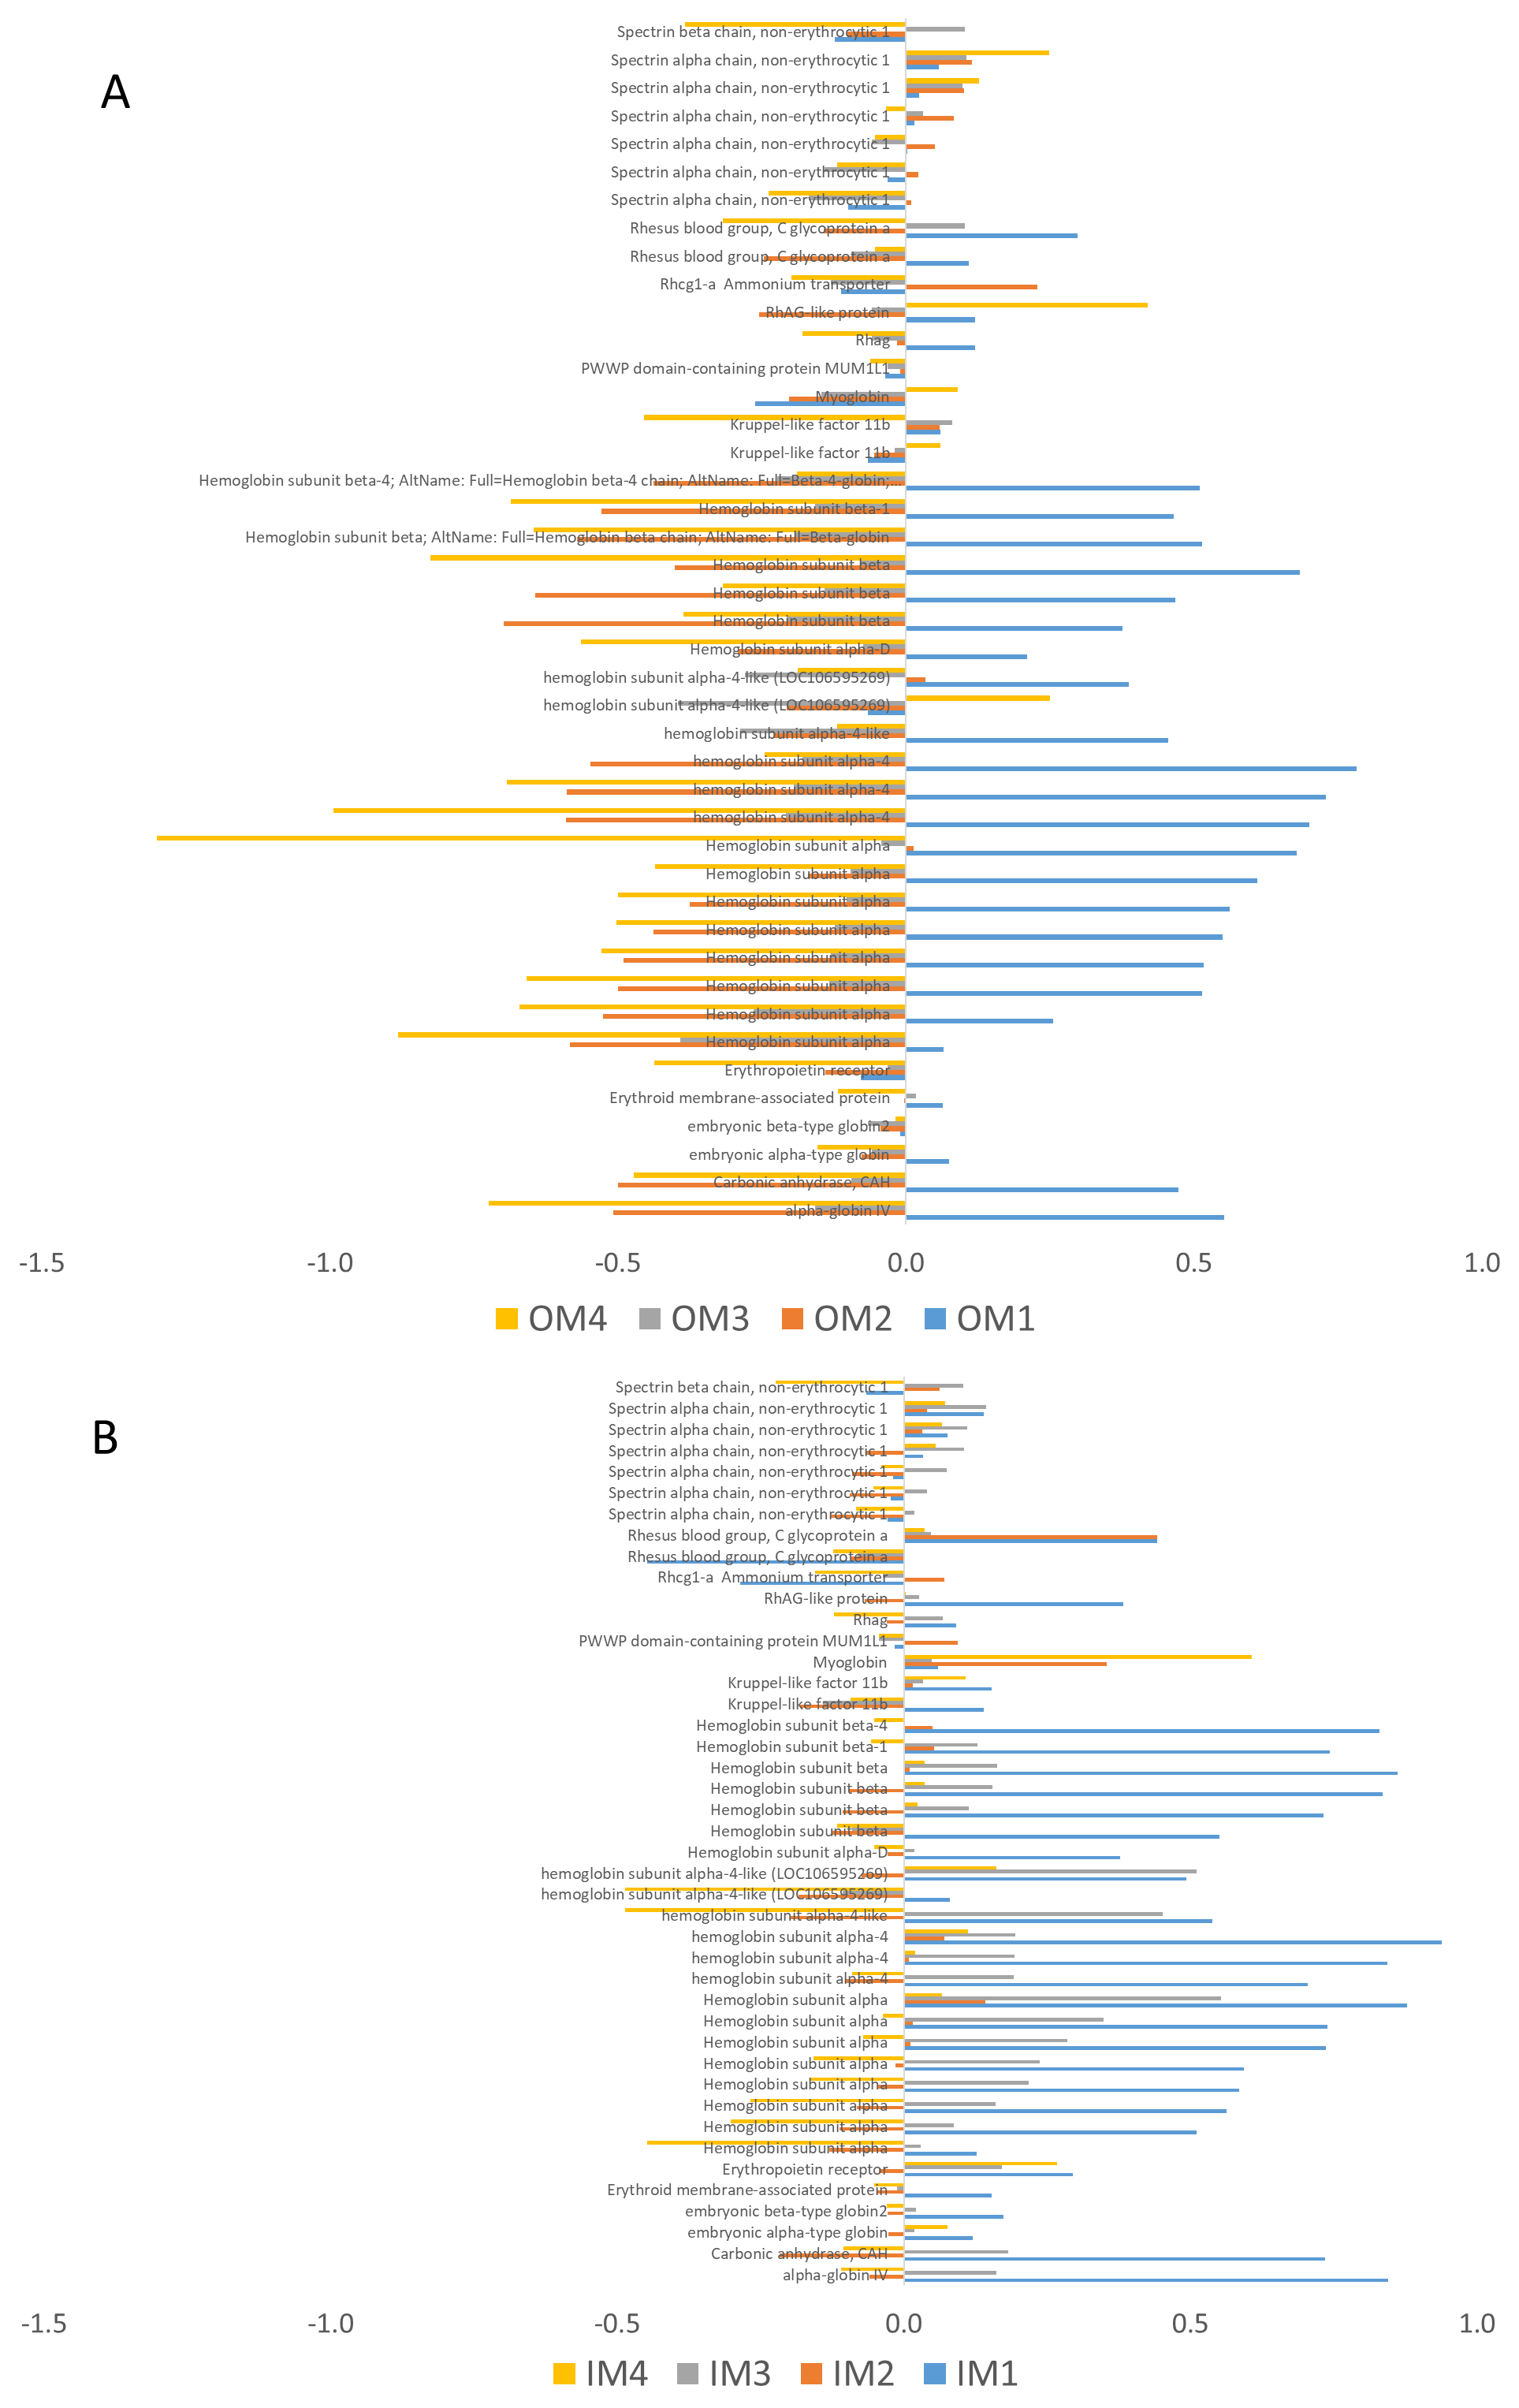


Supplementary - Figure 1 Relative expression of globin metabolism related genes in Atlantic salmon post smolt midguts, fed diets with various levels of trace minerals in organic (A) and inorganic (B) form
